# Supplementary material for: Purification of DNA-origami nanostructures by rate-zonal centrifugation
Source: PubMed Central journal article supplement — Nucleic Acids Res. 2012 Nov 15;41(2):e40. doi: 10.1093/nar/gks1070 (PMC3553994; doi:10.1093/nar/gks1070), 2012-11-15
Supplement: supp_gks1070_nar-02644-met-f-2012-File002.pdf [file supp_gks1070_nar-02644-met-f-2012-File002.pdf]

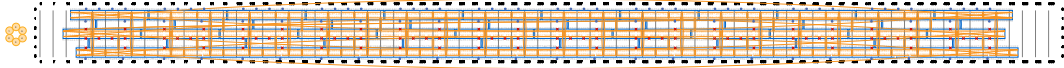

Figure S1a

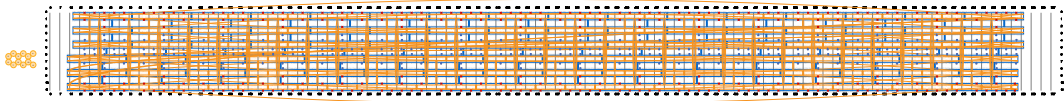

Figure S1b

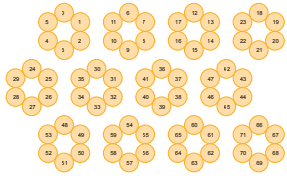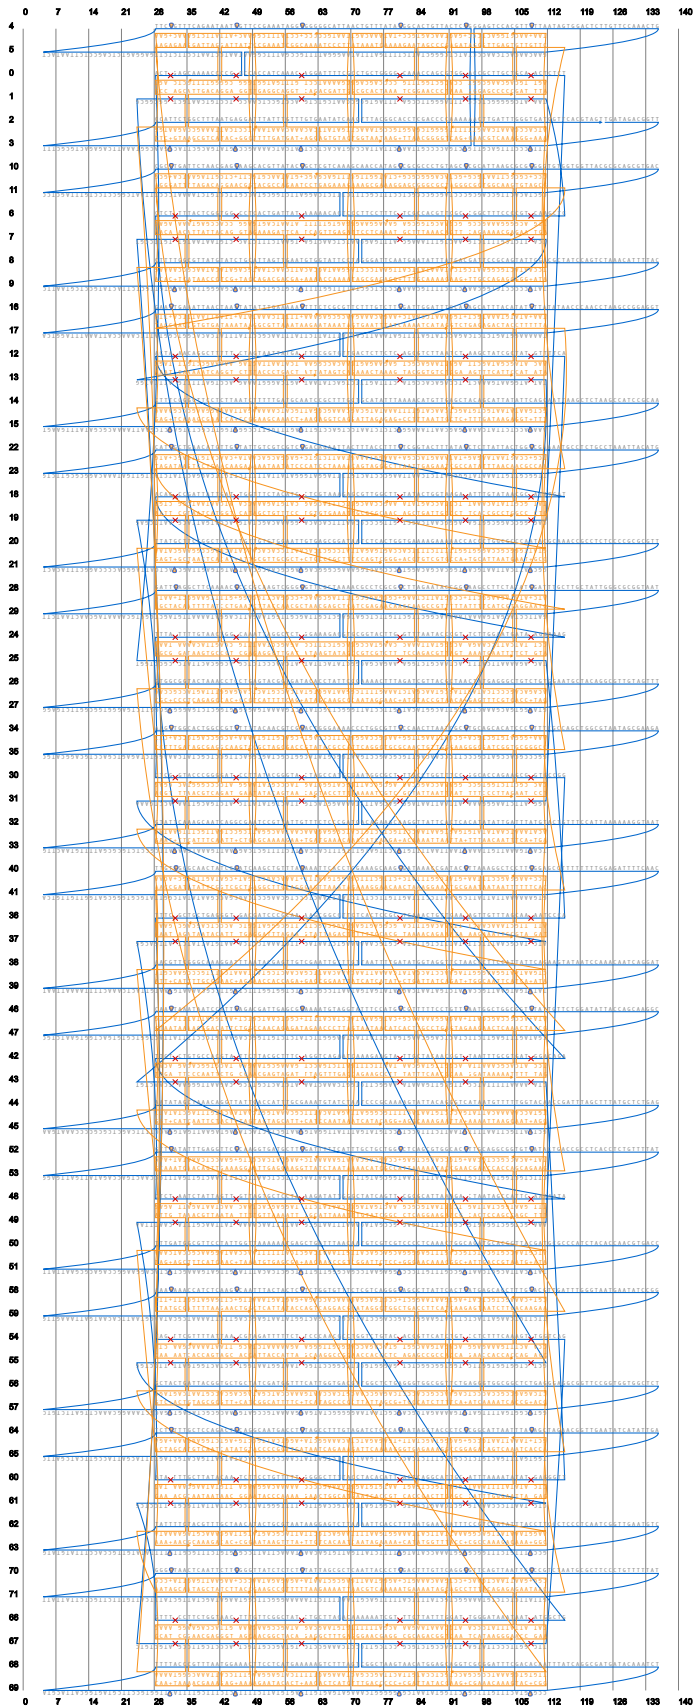

Figure S1c

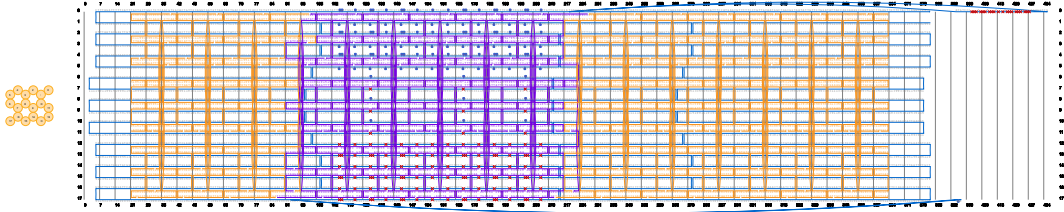

Figure S1d

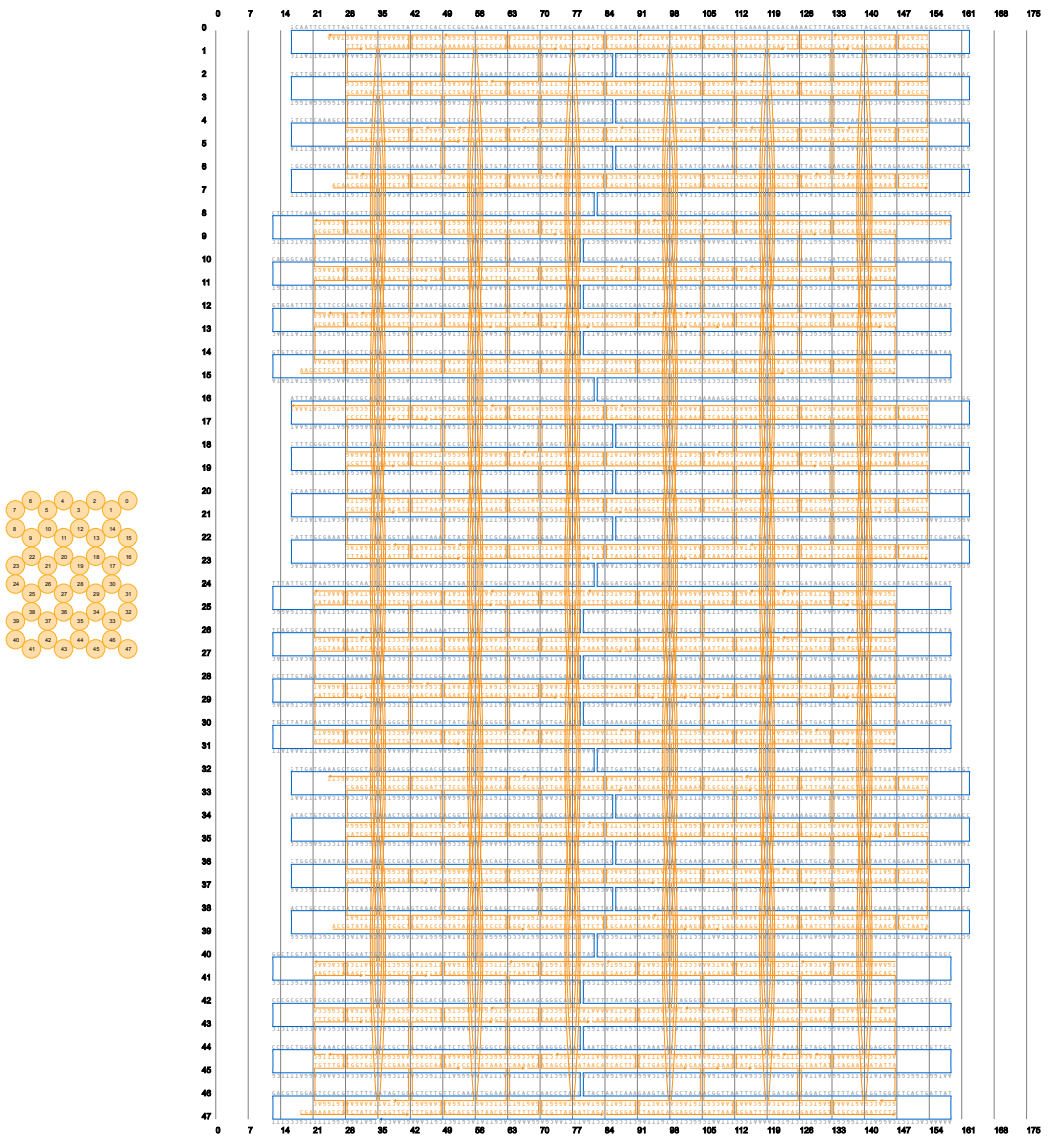

Figure S1e

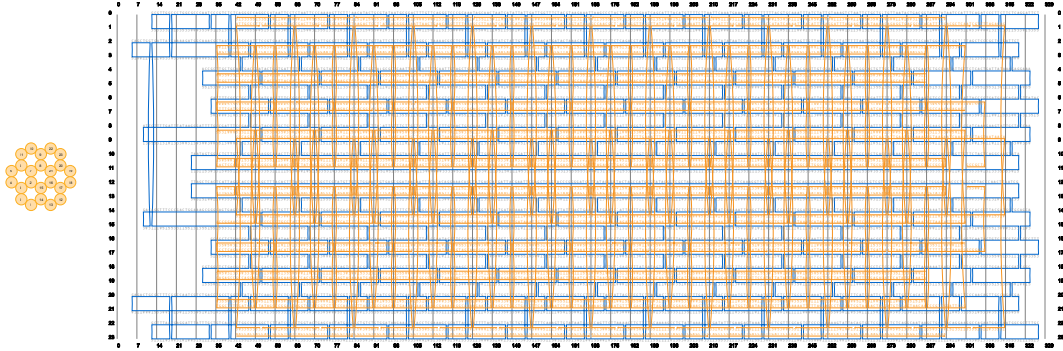

Figure S1f

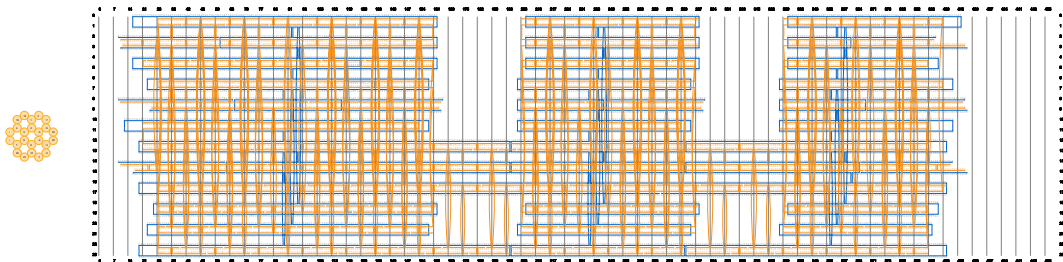

Figure S1g

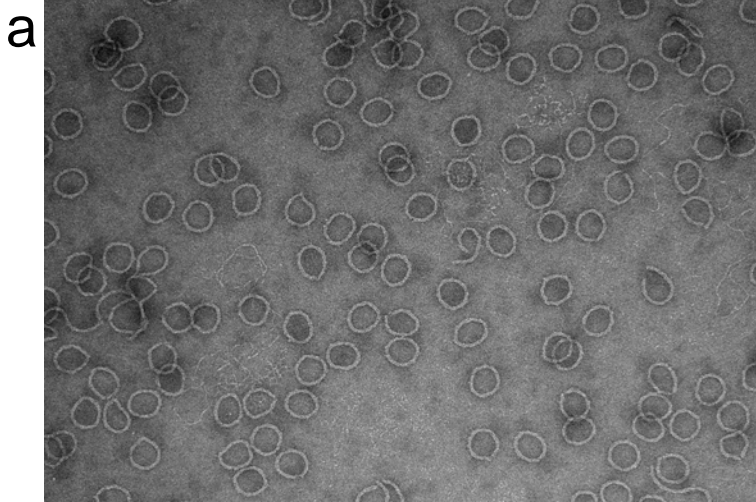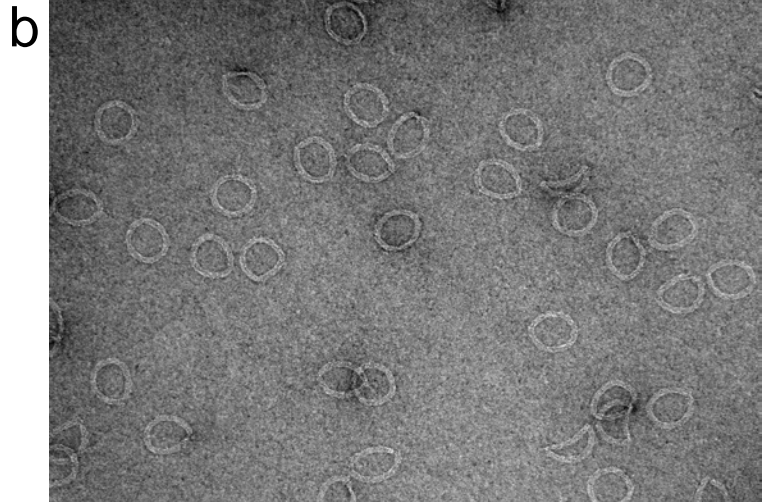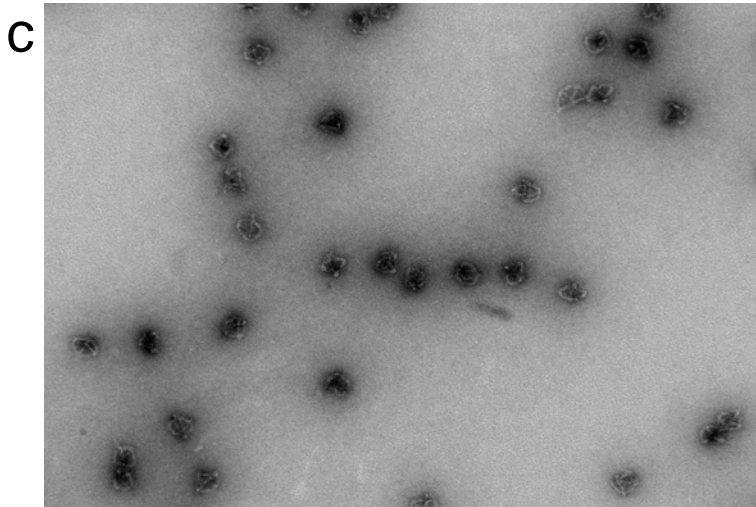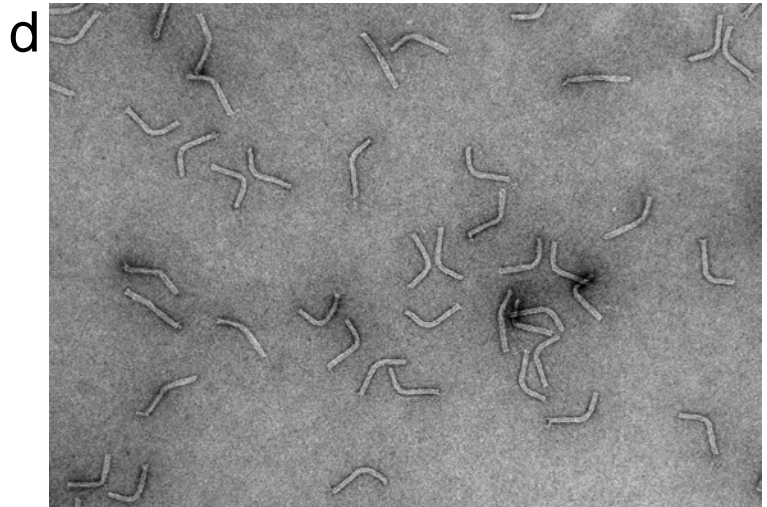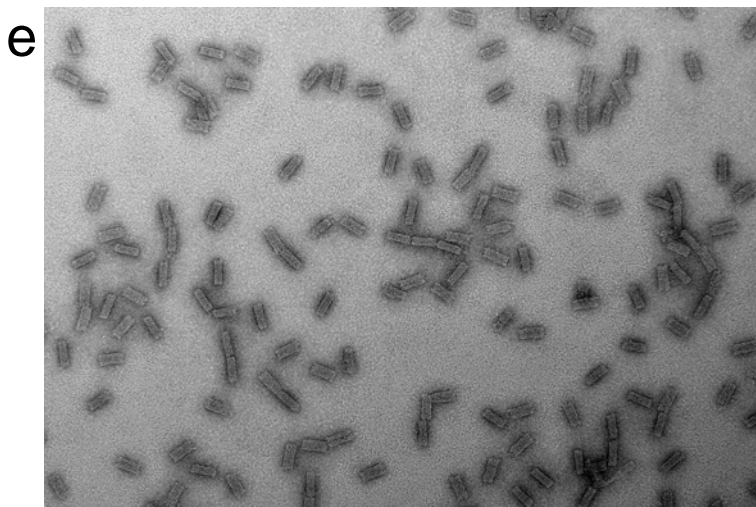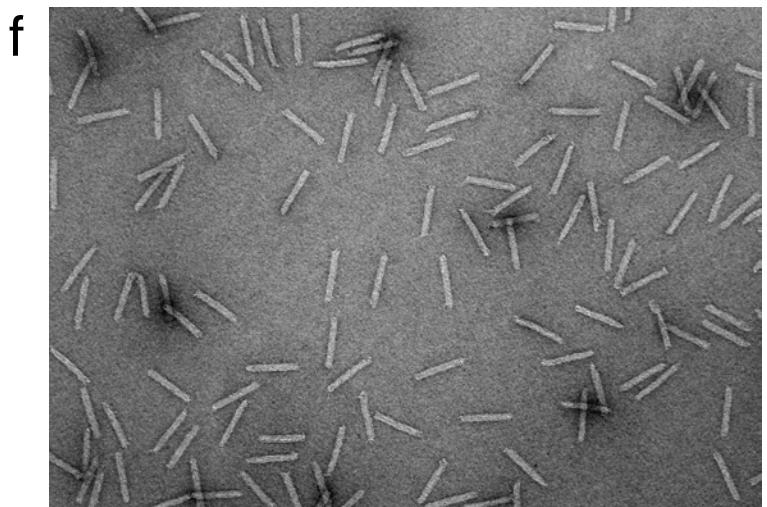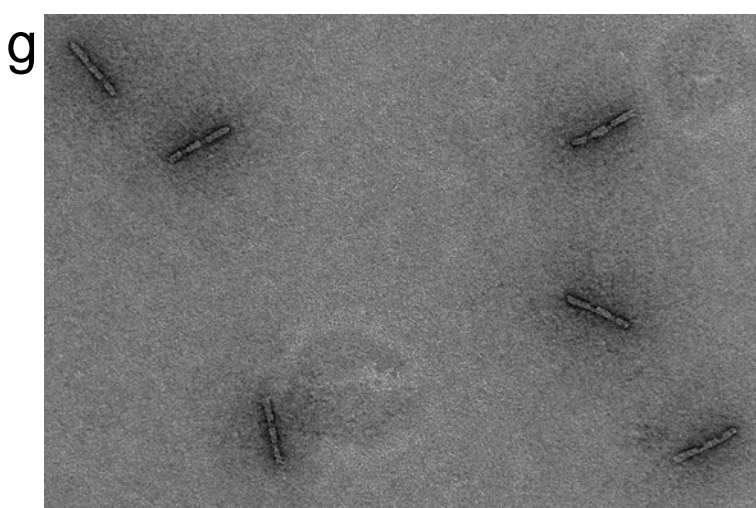

200 nm

Figure S2

6-hb ring  
purified by  
AGE

6-hb ring  
purified by  
centrifugation

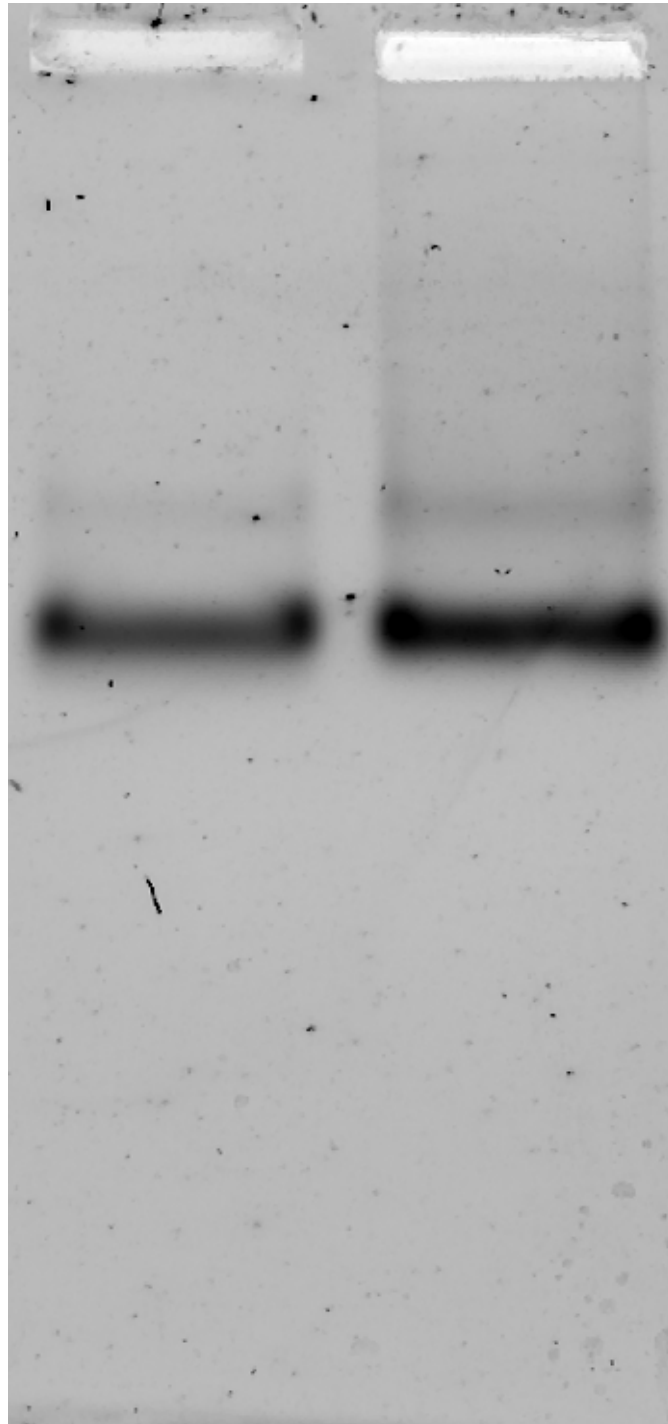

Figure S3

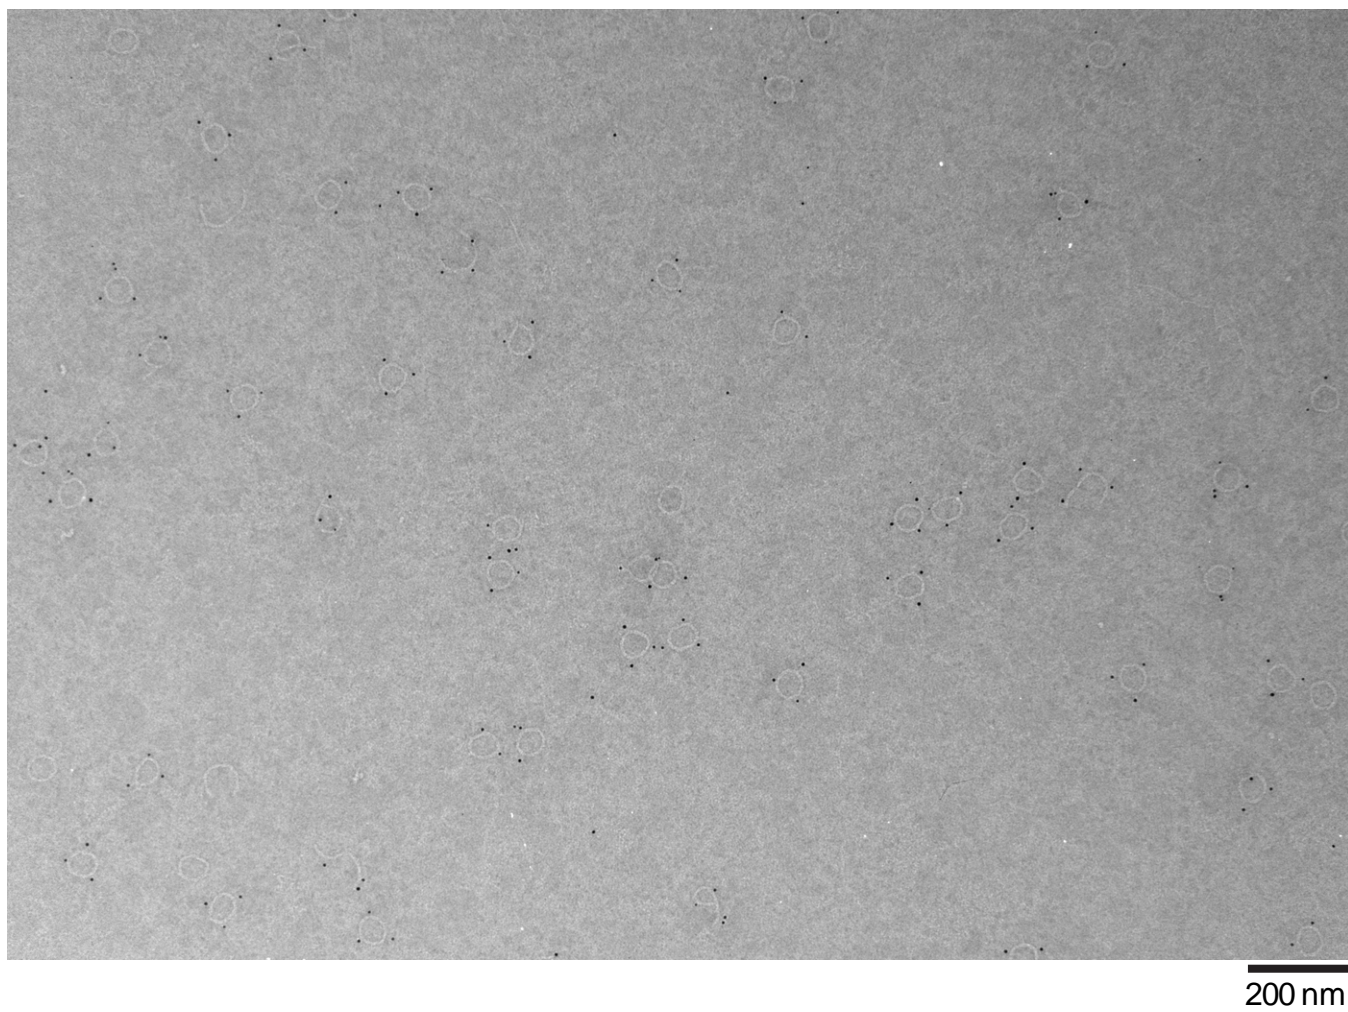

Figure S4



## Supplementary Figure Legends

**Figure S1.** Strand diagrams of the seven DNA-origami structures used in this work. Scaffold strands are shown in blue and staple strands in orange. (a) 6-helix-bundle (6-hb) ring, (b) 12-hb ring, (c) octahedron with curved 6-hb edges, (d) 18-hb rod with a region (1/3 of full length) bent by 90°, (e) 48-hb brick, (f) 24-hb rod, and (g) 24-hb rod with two cavities.

**Figure S2.** Representative transmission electron microscope images of the DNA-origami structures purified *via* rate-zonal centrifugation. (a) 6-helix-bundle (6-hb) ring, (b) 12-hb ring, (c) octahedron with curved 6-hb edges, (d) 18-hb rod with a region (1/3 of full length) bent by 90°, (e) 48-hb brick, (f) 24-hb rod, and (g) 24-hb rod with two cavities. Scale bar for all panels: 200 nm.

**Figure S3.** Side-by-side comparison of DNA-origami 6-hb rings purified by agarose gel electrophoresis (AGE, left) and rate-zonal centrifugation (right).

**Figure S4.** Representative transmission electron microscope image of 6-hb rings each hosting three 5-nm gold nanoparticles. Scale bar: 200 nm.
